# Supplementary material for: Morphology-controlled solvothermal synthesis of LiFePO4 as a cathode material for lithium-ion batteries
Source: Royal Society of Chemistry journal article supplement (doi:10.1039/c0jm01346c), 2010-01-01
Supplement: c0jm01346c.pdf [file c0jm01346c.pdf]

## Electronic Supplementary Information

### *For “Morphology-Controlled Solvothermal Synthesis of $\text{LiFePO}_4$ as a Cathode Material for Lithium-ion Batteries”*

*Shiliu Yang, Xufeng Zhou, Jiangan Zhang, Zhaoping Liu\**

Ningbo Institute of Material Technology & Engineering (NIMTE), Chinese Academy of Sciences

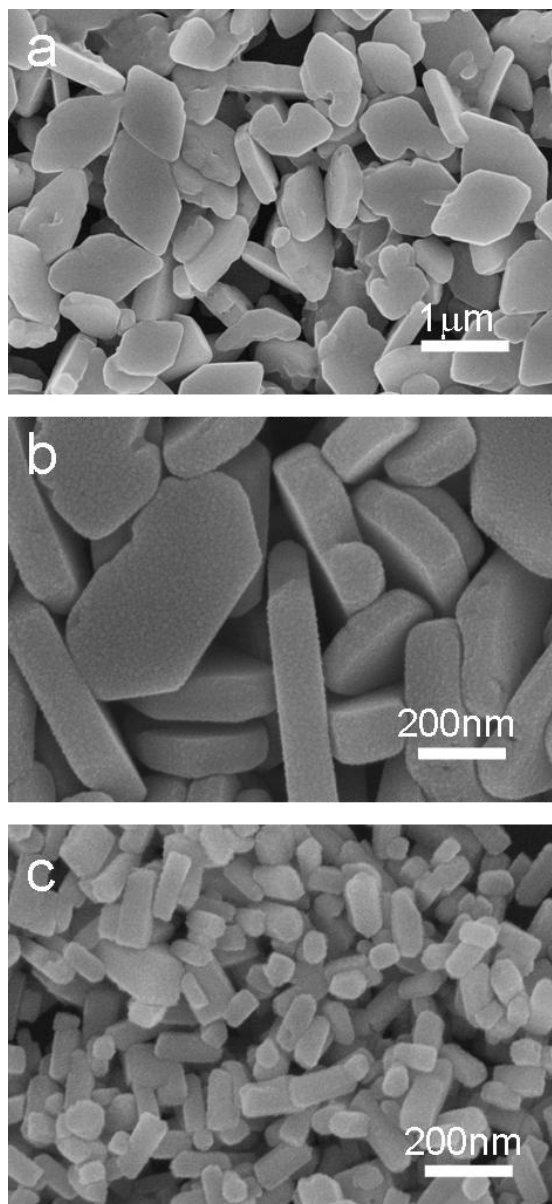

**Figure S1.** SEM images of the samples synthesized by adjusting synthesis parameters: a) PEG400/water is 1:4; b) Doubling the concentrations of the reactants; c) 220 °C. The other synthesis parameters are kept unchanged with those for the synthesis of the nanoparticles (referred to the Experimental details in the main text).

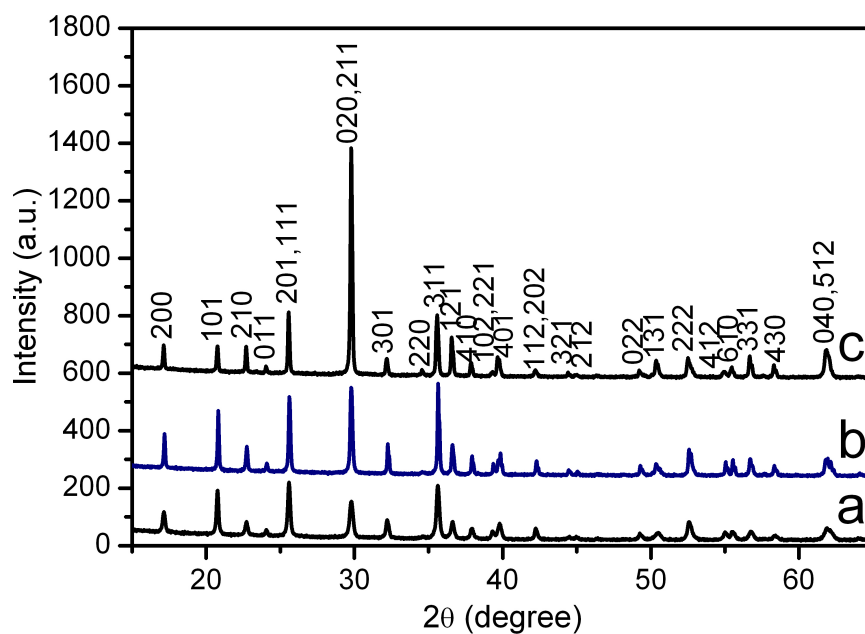

**Figure S2.** XRD patterns of the LFP products: a) nanoparticles prepared at 180 °C for 9 h, b) nanoplates prepared at 140 °C for 24h, and c) microplates prepared at 180 °C for 9 h. Note that, for the synthesis of microplates, the LiOH solution was added into the mixture of  $\text{H}_3\text{PO}_4$  and  $\text{FeSO}_4$ .

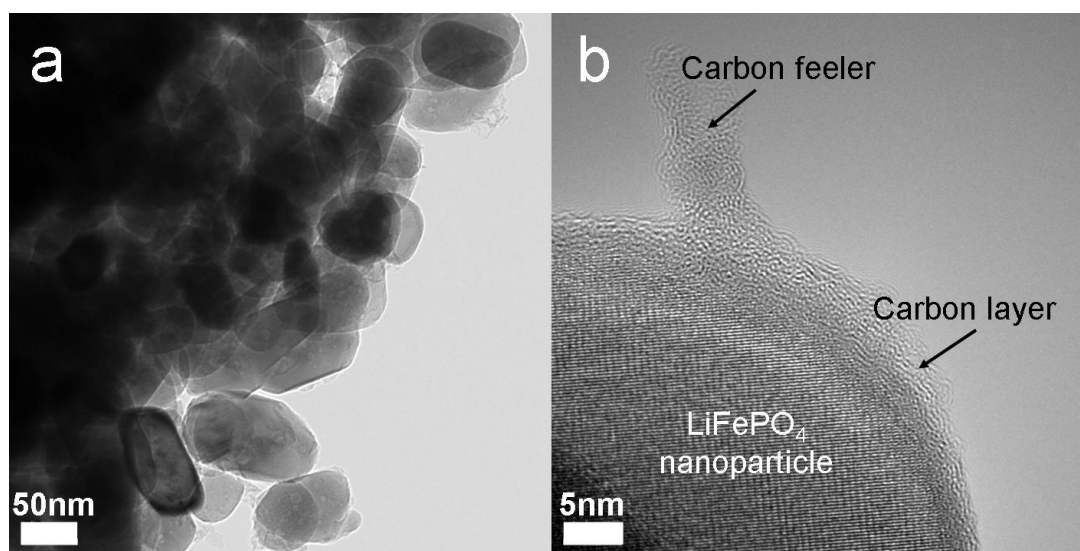

**Figure S3.** a) TEM and b) HRTEM images of the carbon coated LFP nanoparticles.

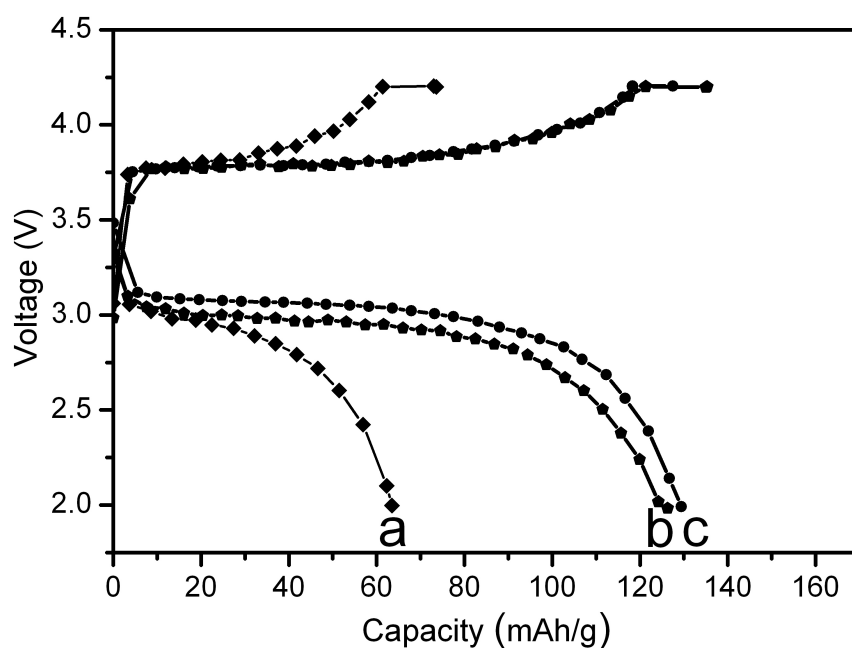

**Figure S4.** The first charge–discharge curves of the carbon coated LFP materials recorded at 20C rate between 2.0 and 4.2 V: a) microplates, b) nanoparticles, and c) nanoplates. Note that the LFP/SP/PVDF ratio is 60:30:10.

**Table S1.** Characteristics of the electrodes of our sample and four high rate LFP materials in references 33-36.

| References | Particle Size (nm) | LFP/C (wt %) | Carbon (wt %) | Binder (wt %) | Loading (mg/cm <sup>2</sup> ) |
|------------|--------------------|--------------|---------------|---------------|-------------------------------|
| Our        | 20-100             | 57/3         | 30            | 10            | 3.5                           |
| 33         | 20-50              | 70/0         | 30            | Included      | 2.8                           |
| 34         | 20-40              | 78/5         | 12            | 5             | 6                             |
| 35         | 60-100             | 52/18        | 20            | 10            | Unknown                       |
| 36         | 50                 | 80/0         | 15            | 5             | 3.86                          |
